# Supplementary material for: Hepatic Suppression of Mitochondrial Complex II Assembly Drives Systemic Metabolic Benefits
Source: PubMed Central journal article supplement (PMC8948583; doi:10.1002/advs.202105587), 2022-01-17
Supplement: ADVS-9-2105587-s001.pdf [file ADVS-9-2105587-s001.pdf]

## Supporting Information

for *Adv. Sci.*, DOI: 10.1002/advs.202105587

Hepatic suppression of mitochondrial complex II assembly  
drives systemic metabolic benefits

*Xueqiang Wang, Weiqiang Lv, Jie Xu, Adi Zheng, Mengqi Zeng, Ke  
Cao, Xun Wang, Yuting Cui, Hao Li, Meng Yang, Yongping Shao,  
Fang Zhang, Xuan Zou, Jiangang Long, Zhihui Feng\*, Jiankang  
Liu\**

## Supporting Information

### **Hepatic suppression of mitochondrial complex II assembly drives systemic metabolic benefits**

*Xueqiang Wang, Weiqiang Lv, Jie Xu, Adi Zheng, Mengqi Zeng, Ke Cao, Xun Wang, Yuting Cui, Hao Li, Meng Yang, Yongping Shao, Fang Zhang, Xuan Zou, Jiangang Long, Zhihui Feng\*, Jiankang Liu\**

## Supplemental Figure 1

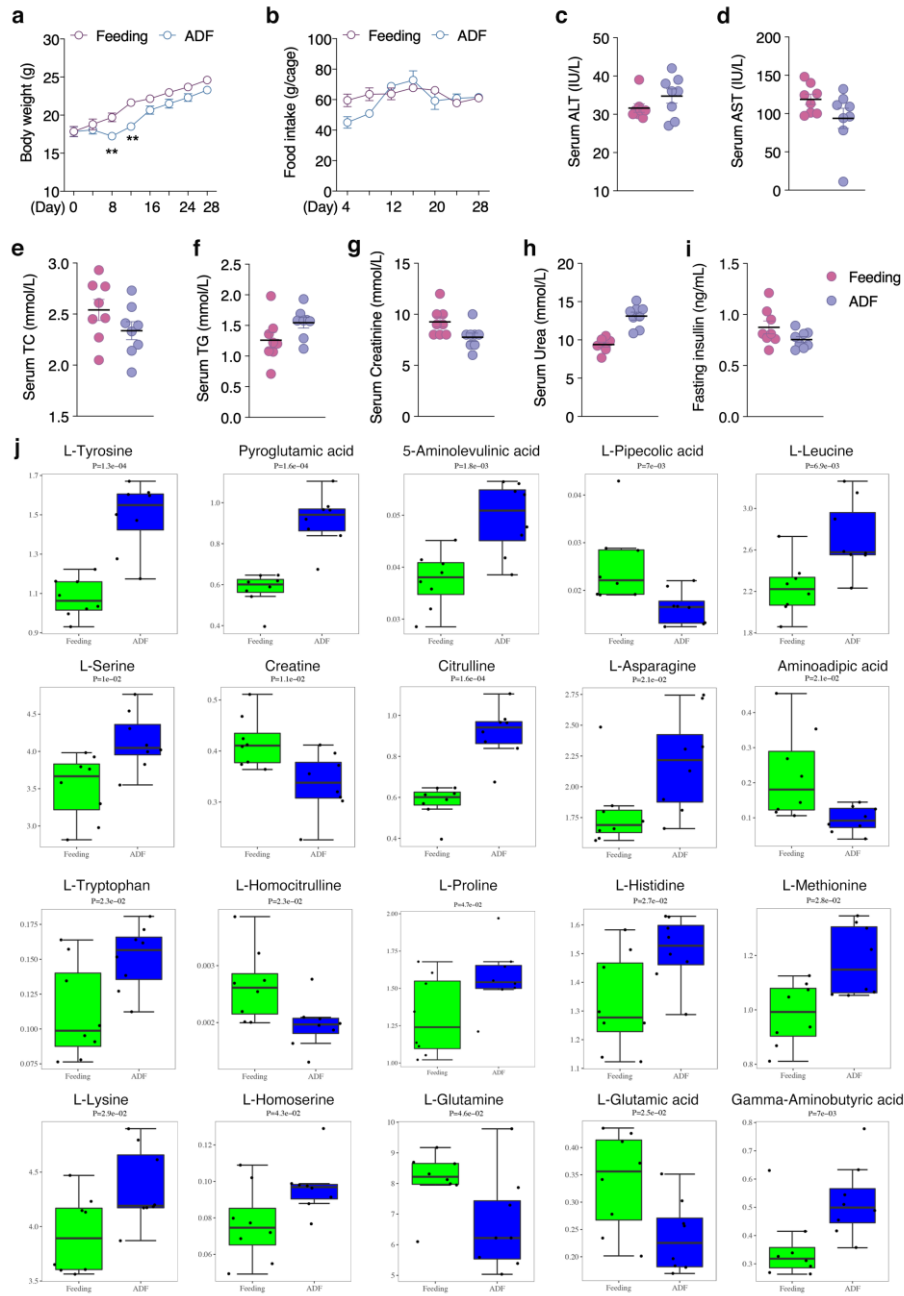

**Figure S1 (Related to Figure 1). Blood analysis of mice under ADF intervention. a-b,** Body weight curve (a) and food intake (b) during ADF intervention for 4 weeks, n=8. **c-i,** serum ALT, AST, total cholesterol, total glycerides, creatinine, urea and fasting insulin levels of mice after ADF intervention, n=8. **j,** Boxplots of significant amino acids metabolites differed after ADF intervention ( $p < 0.05$ ). Values are mean  $\pm$  SEM, \* $p < 0.05$ , \*\* $p < 0.01$ .

## Supplemental Figure 2

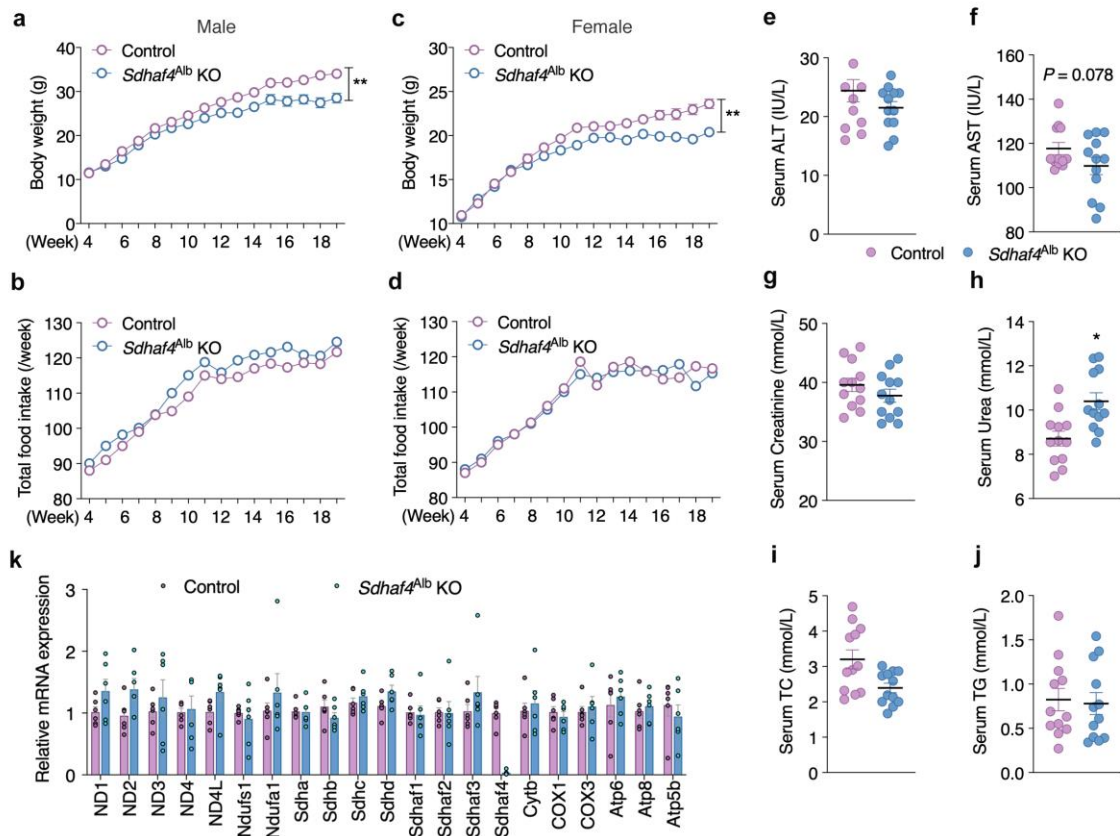

**Figure S2 (Related to Figure 2). Characterization of hepatic *Sdhaf4* knockout mice. a-b**, Body weight curve for both male (**a**) and female (**b**) control and *Sdhaf4*<sup>Alb</sup> KO mice from age of 4 weeks to 19 weeks under normal feeding, n=9. **c-d**, Food intake curve for both male (**c**) and female (**d**) mice from age of 4 weeks to 19 weeks under normal feeding, n=9. **e-j**, Serum ALT (**e**), AST (**f**), creatinine (**g**), urea (**h**), total glycerides (**i**) and cholesterol (**j**) levels of control and *Sdhaf4*<sup>Alb</sup> KO mice at the age of 8 weeks, n=9. **k**, mRNA levels of representative mitochondrial complex subunits in liver of control and *Sdhaf4*<sup>Alb</sup> KO mice, n=9. Values are mean  $\pm$  SEM, \*p < 0.05, \*\*p < 0.01.

### Supplemental Figure 3

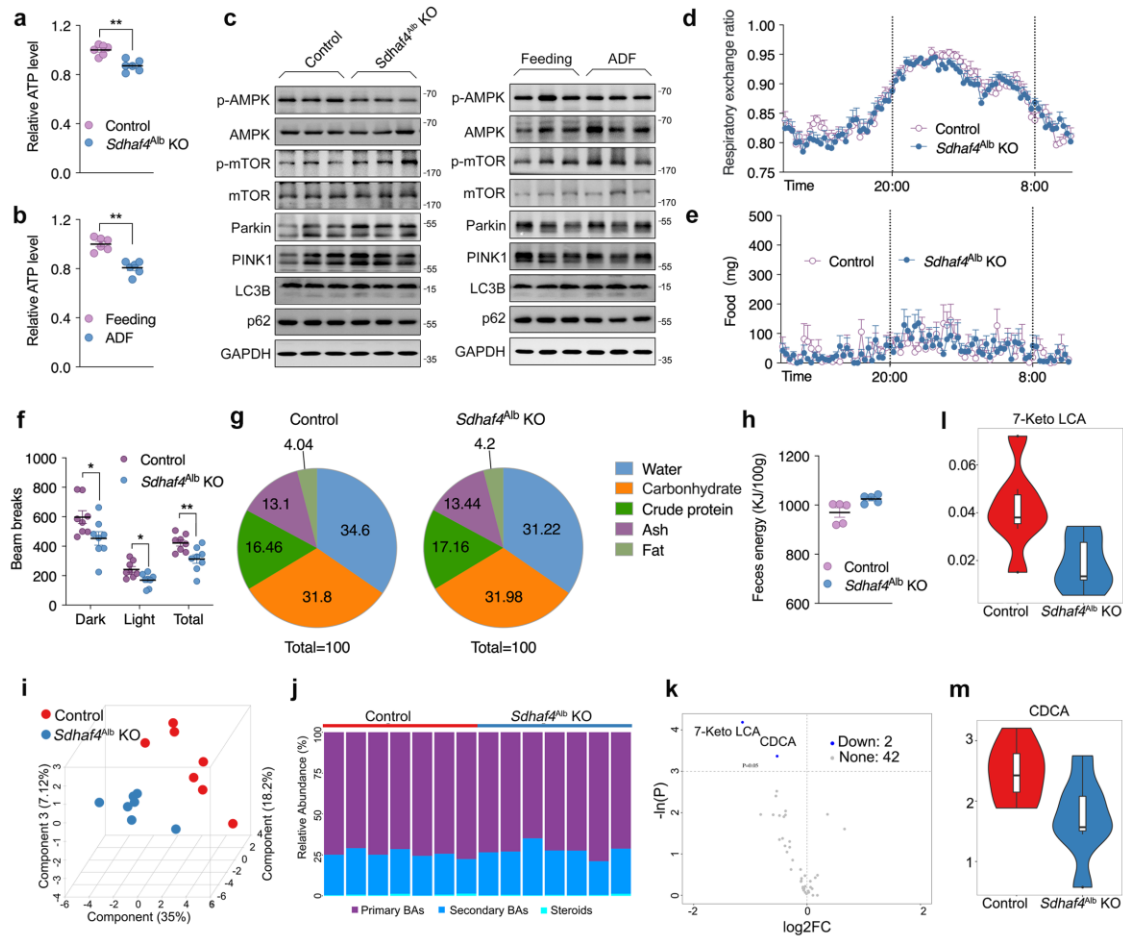

**Figure S3 (Related to Figure 2). Hepatic *Sdhaf4* knockout mice present comparable changes in hepatic mitophagy, energy consumption, and bile acid metabolism. a-b**, ATP level in the liver of control and *Sdhaf4*<sup>Alb</sup> KO mice (a), regular feeding and ADF intervened mice for 4 weeks (b), n=6. **c**, Immunoblots analysis of mitophagy associated genes in control and *Sdhaf4*<sup>Alb</sup> KO mice, regular feeding and ADF intervened mice for 4 weeks, n=3. **d-f**, Metabolic cage analysis of control and *Sdhaf4*<sup>Alb</sup> KO mice at the age of 8 weeks, respiratory exchange ratio (d), food intake (e), and ambulatory activity (f) for 24 hours, n=8. **g-h**, Feces composition (g) and residue energy (h) in control and *Sdhaf4*<sup>Alb</sup> KO mice, n=5. **i-k**, Profile analysis of bile acids in control and *Sdhaf4*<sup>Alb</sup> KO mice, 3D PLS-DA scores plot (i), stacked chart figure for relative abundance of each metabolite classes (j), and the volcano plot showing the differential metabolites (k), n=7. **l-m**, Violin plot of differential metabolites 7-Keto LCA (l) and CDCA (m), n=7. Values are mean  $\pm$  SEM, \*p < 0.05, \*\*p < 0.01. 7-Keto LCA, 7-keto Lithocholic Acid; CDCA, Chenodeoxycholic acid.

## Supplemental Figure 4

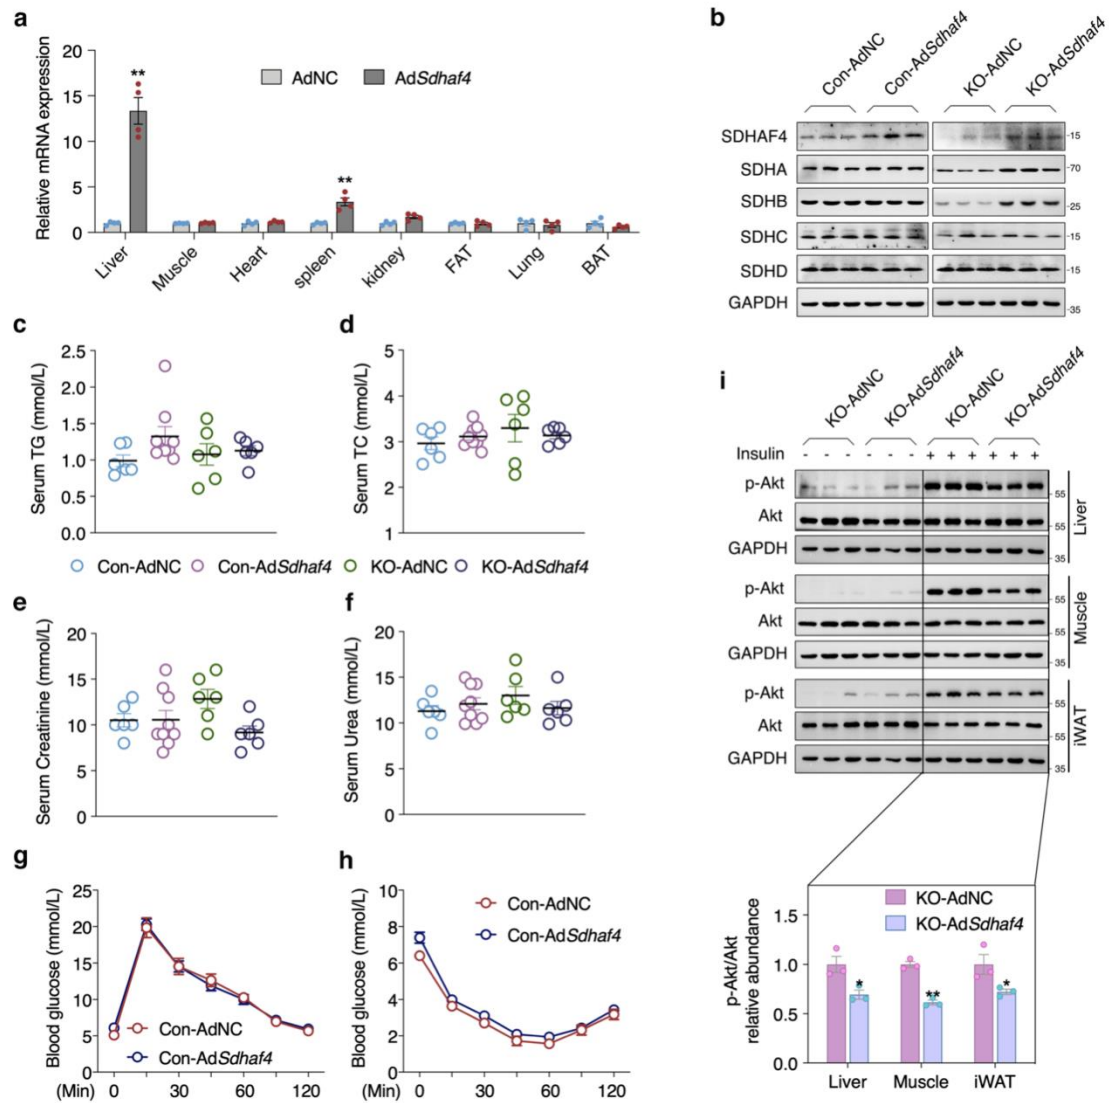

**Figure S4 (Related to Figure 3). Hepatic rescue of *Sdhaf4* expression in knockout mice suppresses metabolic sensitivity.** **a**, mRNA levels of *Sdhaf4* in tissues of control mice after adenovirus infection for 3 weeks, n=4. **b**, Immunoblots analysis of SDHAF4 and complex II subunits in control and *Sdhaf4*<sup>Alb</sup> KO mice after adenovirus mediated hepatic *Sdhaf4* overexpression for 3 weeks, n=3. **c-f**, serum total glycerides (**c**), total cholesterol (**d**), creatinine (**e**), and urea (**f**) levels of control and *Sdhaf4*<sup>Alb</sup> KO mice after hepatic *Sdhaf4* overexpression for 3 weeks, n=6 or 8. **g-h**, Glucose tolerance test (**g**) and insulin tolerance test (**h**) in control mice after adenovirus mediated hepatic *Sdhaf4* overexpression for 2 weeks, n=6, or 8. **i**, Immunoblots analysis of p-Akt level in iWAT, muscle, and liver tissues of control and *Sdhaf4*<sup>Alb</sup> KO mice under adenovirus infection with or without insulin challenge, n=3. Values are mean  $\pm$  SEM, \*p< 0.05, \*\*p< 0.01.

## Supplemental Figure 5

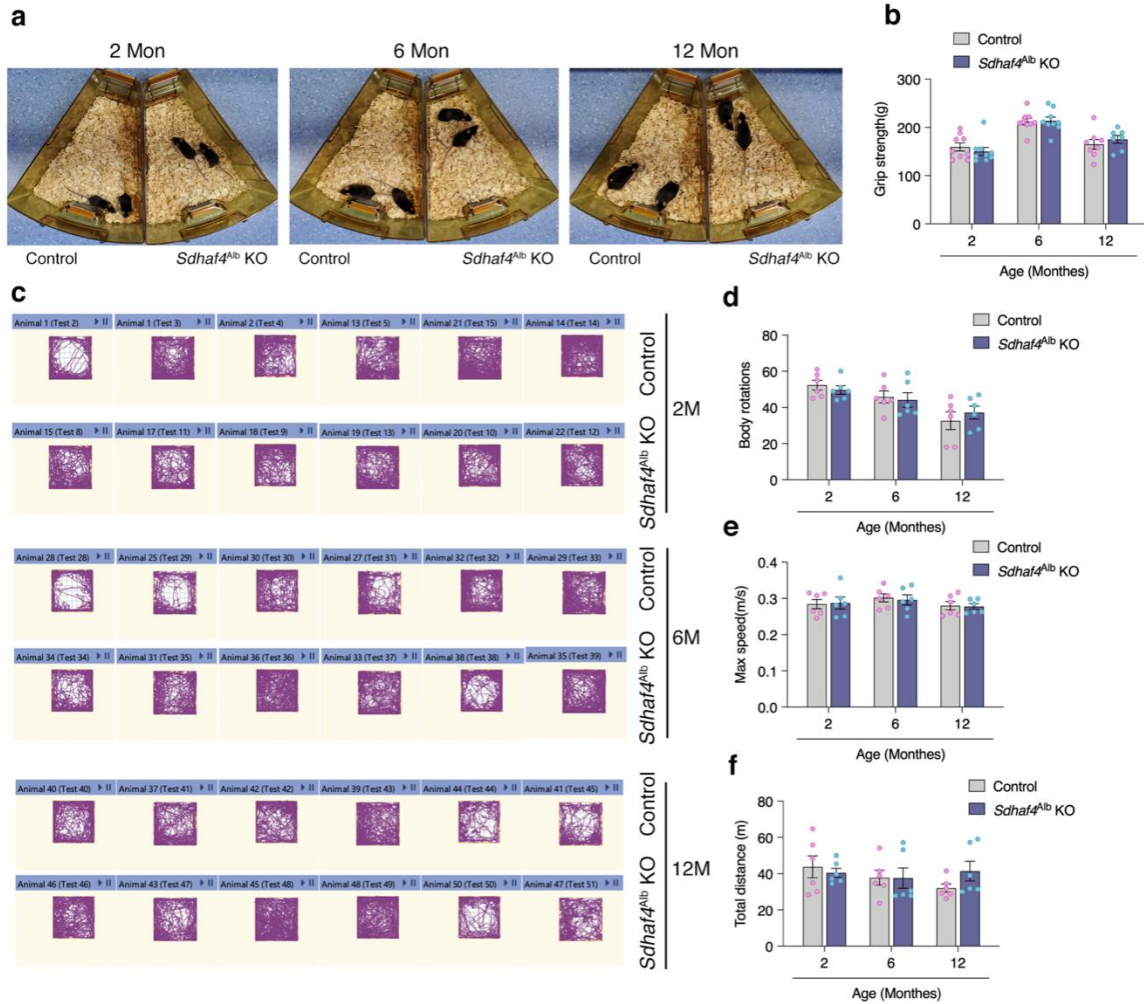

**Figure S5 (Related to Figure 3). Aging performance of hepatic *Sdhaf4* knockout mice. a**, Representative images of control and *Sdhaf4*<sup>Alb</sup> KO mice at the age of different ages. **b**, Grip strength analysis of control and *Sdhaf4*<sup>Alb</sup> KO mice at the age of different ages, n=9. **c-f**, Open field test of control and *Sdhaf4*<sup>Alb</sup> KO mice at the age of different ages, trace image of mice activity (**c**), body rotation records (**d**), max speed travelled (**e**), and total distance travelled (**f**), n=6. Values are mean  $\pm$  SEM.

## Supplemental Figure 6

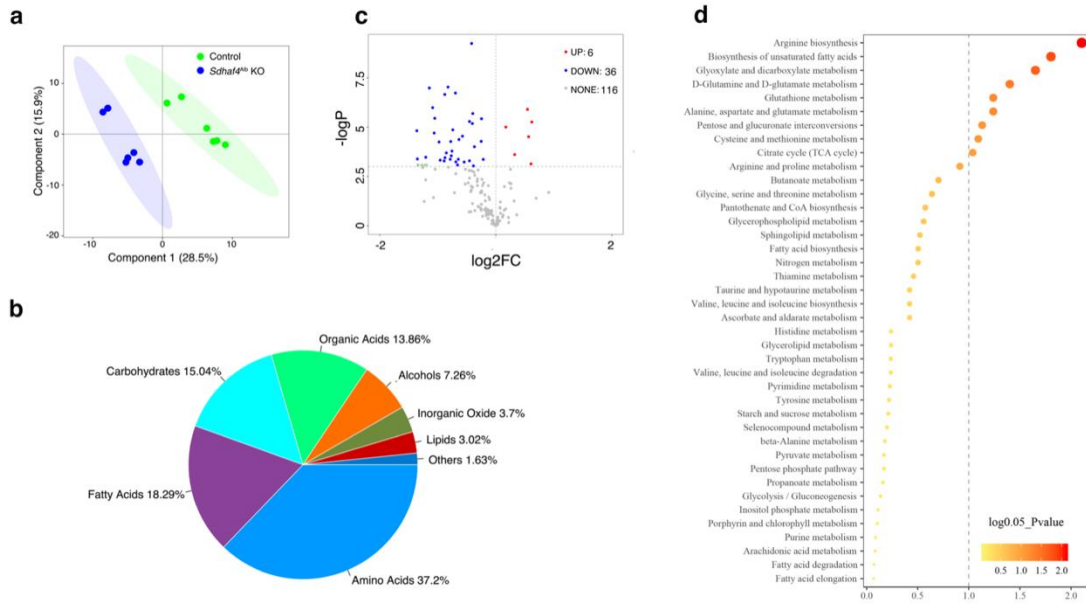

**Figure S6 (Related to Figure 6). Metabolomics analysis for serums of control and *Sdhaf4*<sup>Alb</sup> KO mice. a, 2D PLS-DA scores plot revealing classifications of the samples. b, Metabolite classes and compositions. c, Enhanced volcano plot showing the differential metabolites. d, Metabolic pathway enrichment analysis, n=6.**



## Supplemental Figure 7

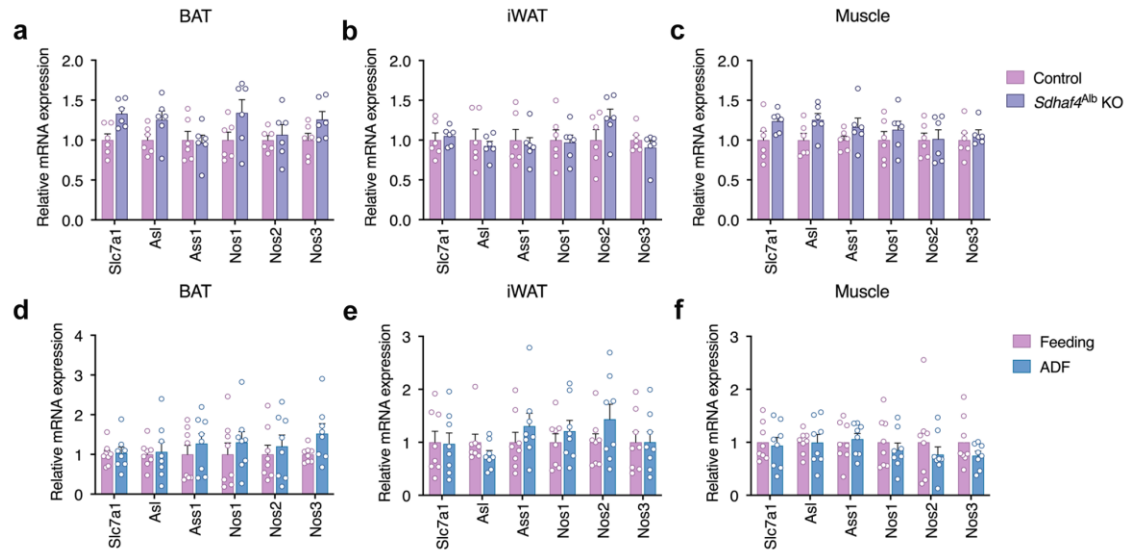

**Figure S7(Related to Figure 6). NO synthesis in peripheral tissues of *Sdhaf4<sup>Alb</sup> KO* mice and ADF intervened mice.** **a-c**, mRNA levels of NO synthesis related genes in the BAT (**a**), iWAT (**b**), and muscle (**c**) tissues of control and *Sdhaf4<sup>Alb</sup> KO* mice, n=6. **e-f**, mRNA levels of NO synthesis related genes in the BAT (**d**), iWAT(**e**), and muscle (**f**) tissues of mice under regular feeding or ADF intervention for 8 weeks, n=8. Values are mean  $\pm$  SEM, \*p< 0.05, \*\*p< 0.01.

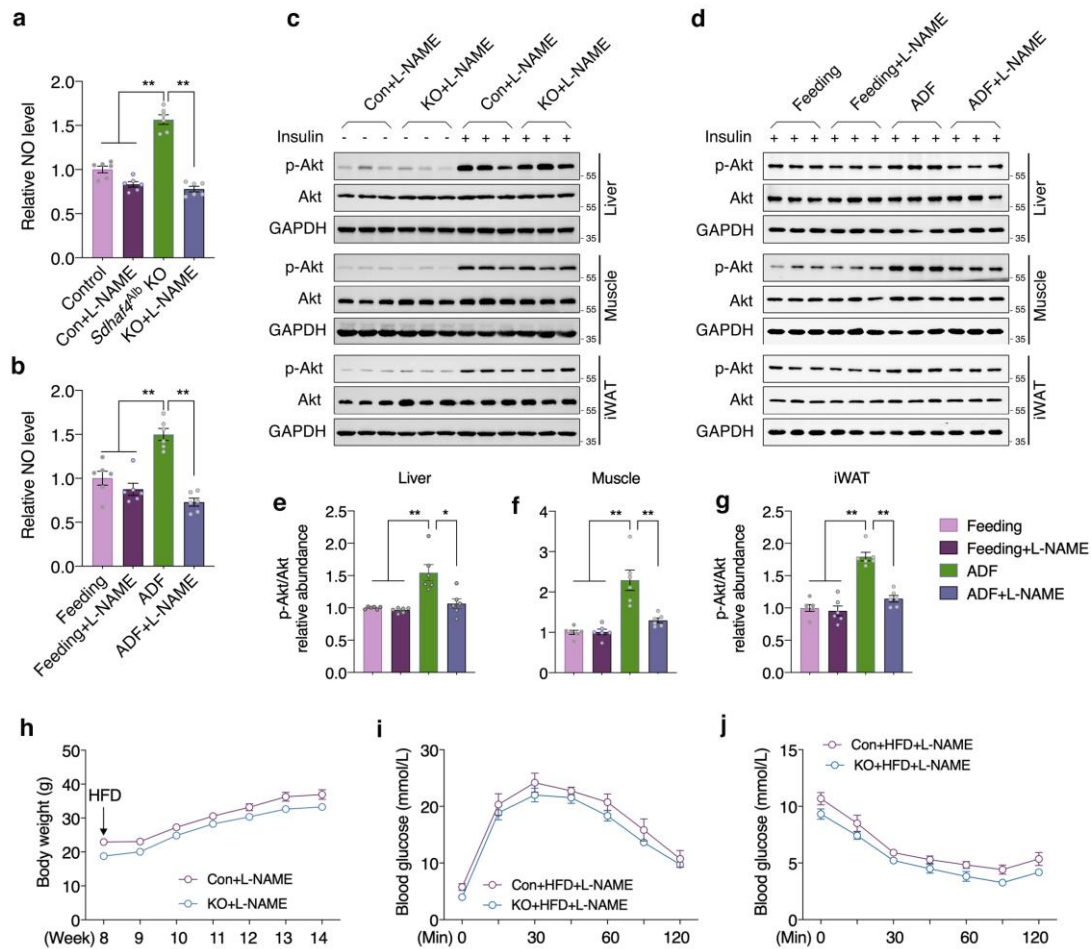

**Figure S8 (Related to Figure 6). Inhibition of NO production abolishes metabolic benefits of *Sdhaf4<sup>Alb</sup>* KO mice.** **a**, Relative NO level of control and *Sdhaf4<sup>Alb</sup>* KO mice under L-NAME supplement. **b**, Relative NO level of regular feeding and ADF intervened mice under L-NAME supplement. **c**, Immunoblots analysis of p-Akt level in iWAT, muscle, and liver tissues of control and *Sdhaf4<sup>Alb</sup>* KO mice under L-NAME supplement with or without insulin challenge, n=3. **d-g**, Immunoblots analysis of p-Akt level in iWAT, muscle, and liver tissues of regular feeding and ADF intervened mice under L-NAME supplement with or without insulin challenge, n=6. **h**, Body weight curve of control and *Sdhaf4<sup>Alb</sup>* KO mice supplement with L-NAME for 7 weeks and HFD for 6 weeks, n=8. **i-j**, Glucose tolerance test (**i**) and insulin tolerance test (**j**) for control and *Sdhaf4<sup>Alb</sup>* KO mice supplement with L-NAME for 7 weeks and HFD for 6 weeks, n=8. Values are mean  $\pm$  SEM, \*p < 0.05, \*\*p < 0.01.

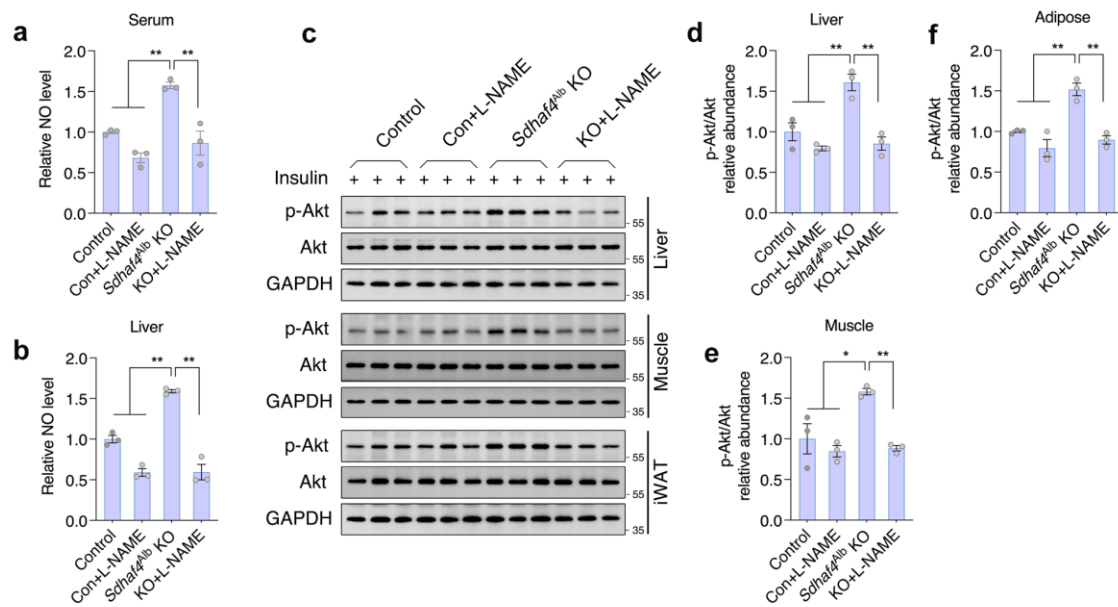

**Figure S9 (Related to Figure 6). Short-term inhibition of NO production suppresses insulin signaling in target tissues. a-b,** Serum NO (a) and hepatic NO (b) level in the control and *Sdhaf4<sup>Alb</sup>* KO mice with or without L-NAME supplement for 24 h, n=3. **c-f,** Immunoblots analysis of p-Akt level in iWAT, muscle, and liver tissues of control and *Sdhaf4<sup>Alb</sup>* KO mice under L-NAME supplement for 24h, followed by insulin challenge for 15 min, n=3. Values are mean  $\pm$  SEM, \* $p$ < 0.05, \*\* $p$ < 0.01.

**Supplemental Table 1**

| Species | Gene          | Primer (5'-3')                    |
|---------|---------------|-----------------------------------|
| Mouse   | <i>Gapdh</i>  | Forward: CTTCAACAGCAACTCCCCTCTTCC |
|         |               | Reverse: GGTGGTCCAGGGTTTCTTACTCC  |
| Mouse   | <i>Sdhaf1</i> | Forward: AAGTTCTGAGCCTGTACCGC     |
|         |               | Reverse: TTAAACGAGCGCGGCAAAAA     |
| Mouse   | <i>Sdhaf2</i> | Forward: ACACACAGGGCAGTCATCTG     |
|         |               | Reverse: ATAGCACCTTGGGCTTGAC      |
| Mouse   | <i>Sdhaf3</i> | Forward: TAAGACTGTTGGTCCTGGCG     |
|         |               | Reverse: GGGAGAGAGGTGCCAAAACA     |
| Mouse   | <i>Sdhaf4</i> | Forward: AGGGACGCTGCATTGACTTT     |
|         |               | Reverse: GACTCTGCCCTGACACACTT     |
| Mouse   | <i>Asl</i>    | Forward: CTCTCAACCTGCTGTCGCTA     |
|         |               | Reverse: CTGTCTCTTTGCATTGGCA      |
| Mouse   | <i>Ass1</i>   | Forward: ACCTCCGGGTCTCTACACAA     |
|         |               | Reverse: ATTCAGGGCTGTGCCAGAAA     |
| Mouse   | <i>Nos1</i>   | Forward: CGGGTGTGACAATCCAAGA      |
|         |               | Reverse: GGGAGGATCCAGTTAGGAGC     |
| Mouse   | <i>Nos2</i>   | Forward: ACAGGGAGAAAGCGCAAAAC     |
|         |               | Reverse: TGCTGTGCTACAGTTCCGAG     |
| Mouse   | <i>Nos3</i>   | Forward: CATGGGCAACTTGAAGAGTGTG   |
|         |               | Reverse: TAGGTGATGCTGCCCCTTC      |
| Mouse   | <i>Slc7a1</i> | Forward: GAAGGGCTCATTGTGGATCTCT   |
|         |               | Reverse: CCGTCACGTAGCTGTAGAGG     |
| Mouse   | <i>Sdha</i>   | Forward: AGAGATACGCACCTGTTGCC     |
|         |               | Reverse: ACTGGGATGGGCTCCTTAGT     |
| Mouse   | <i>Sdhb</i>   | Forward: TTCCACTCGTTGGCGCTTAG     |
|         |               | Reverse: CCTCGACAGGCCTGAAACTG     |
| Mouse   | <i>Sdhc</i>   | Forward: TCGTTCCTTGCTGAGACAT      |
|         |               | Reverse: AGAGAGACCCCTCCACTCAA     |
| Mouse   | <i>Sdhd</i>   | Forward: CCCAGCACATTCACCTGTCA     |
|         |               | Reverse: GTCCCATGAACGTAGTCGG      |
| Mouse   | <i>ND1</i>    | Forward: CATTCTAATCGCCATAGCCT     |
|         |               | Reverse: GTTGTTAAAGGGCGTATTGG     |
| Mouse   | <i>ND2</i>    | Forward: AAATCCTATCACCTTGC        |
|         |               | Reverse: TTTGTTGCTGCTTCAGTT       |
| Mouse   | <i>ND3</i>    | Forward: CTGACTCCCCAAATAAATCT     |
|         |               | Reverse: TGAATTGCTCATGGTAGTGG     |
| Mouse   | <i>ND4</i>    | Forward: CCATGTAGGAACCCTAAACC     |

|       |               |                                 |
|-------|---------------|---------------------------------|
|       |               | Reverse: TTCCTCATAGGGAGAGAAGG   |
| Mouse | <i>ND4L</i>   | Forward: GGACACTTATATTTTCGCTCT  |
|       |               | Reverse: TTGGACGTAATCTGTTCCGTA  |
| Mouse | <i>ND5</i>    | Forward: TATAACCGCATCGGAGAC     |
|       |               | Reverse: TGGTAGTCATGGGTGGAG     |
| Mouse | <i>Ndufs1</i> | Forward: CTCCTCTTGCCCTTGACTGG   |
|       |               | Reverse: CCAGCCCTTCATTACAGGCA   |
| Mouse | <i>Ndufa1</i> | Forward: GAGAGGTAAAGCCGGGTCAC   |
|       |               | Reverse: GACCAAGCACACCCCATAA    |
| Mouse | <i>Cytb</i>   | Forward: CTGTTTCGCAGTCATAGCC    |
|       |               | Reverse: AAGAATCGGGTCAAGGTG     |
| Mouse | <i>Cox1</i>   | Forward: GAGCGGGAATAGTAGGCACC   |
|       |               | Reverse: CGGCTAGAGGTGGGTAGACT   |
| Mouse | <i>Cox2</i>   | Forward: GCCGACTAAATCAAGCAA     |
|       |               | Reverse: TAGGACAATGGGCATAAA     |
| Mouse | <i>Cox3</i>   | Forward: CGAAACACATAAATCAAG     |
|       |               | Reverse: GTCGTAGTAGGCAAACAA     |
| Mouse | <i>Cox6c</i>  | Forward: AGCGTCTGCGGGTTCATATT   |
|       |               | Reverse: CGCCAACTTATAGGCAGCG    |
| Mouse | <i>Cox7c</i>  | Forward: ATTTCTTCCGCTTCCGTGT    |
|       |               | Reverse: CCGCCACTTGTTTTCCACTG   |
| Mouse | <i>Uqcrg</i>  | Forward: TGAGCCACGCGTCTATCTTC   |
|       |               | Reverse: TTGGCTGTAGCAGTCAAGGG   |
| Mouse | <i>Uqcrb</i>  | Forward: TCTCAGGTCAAATGGCGGG    |
|       |               | Reverse: GTATGGTGAGACCAGGCACA   |
| Mouse | <i>Atp6</i>   | Forward: CCTATCCCATCCTCAA       |
|       |               | Reverse: GGGTTCATGTTTCGTCCTT    |
| Mouse | <i>Atp8</i>   | Forward: ACTGGCACCTTCACCAA      |
|       |               | Reverse: GGTAATGAATGAGGCAAATAGA |
| Mouse | <i>Atp5pb</i> | Forward: TCCAGGGGTATTACAGGCAAC  |
|       |               | Reverse: ATTGGCTGAGCTTGAGCCTT   |
| Mouse | <i>Atp5b</i>  | Forward: GTTGGTCCTGAGACCTTGGG   |
|       |               | Reverse: TCCGATTTTCCCACCCTTGG   |
